# Supplementary material for: High LYRM4-AS1 predicts poor prognosis in patients with glioma and correlates with immune infiltration
Source: PeerJ journal article supplement (doi:10.7717/peerj.16104), 2023-10-03

OH  
U87 MG

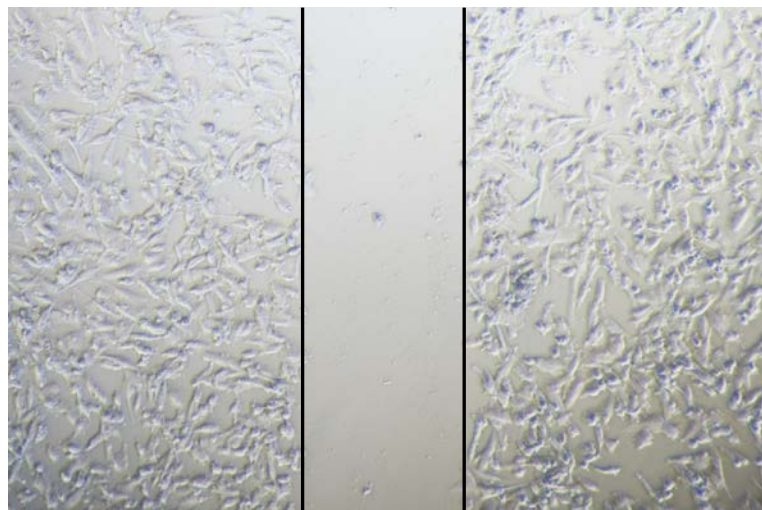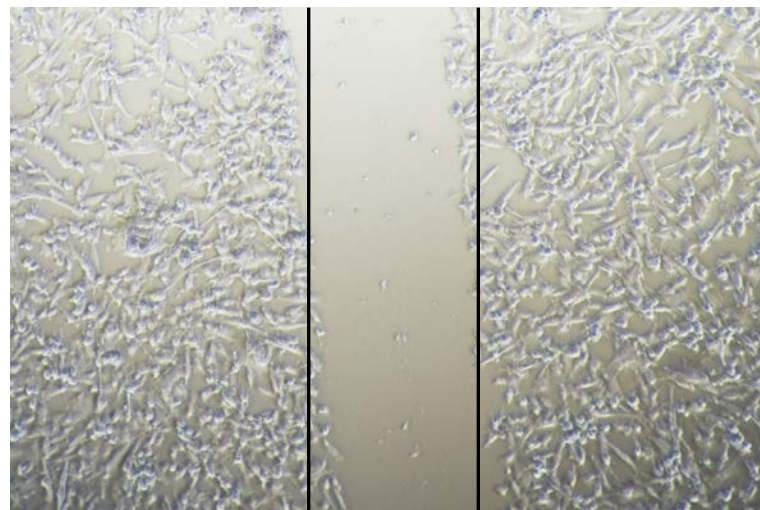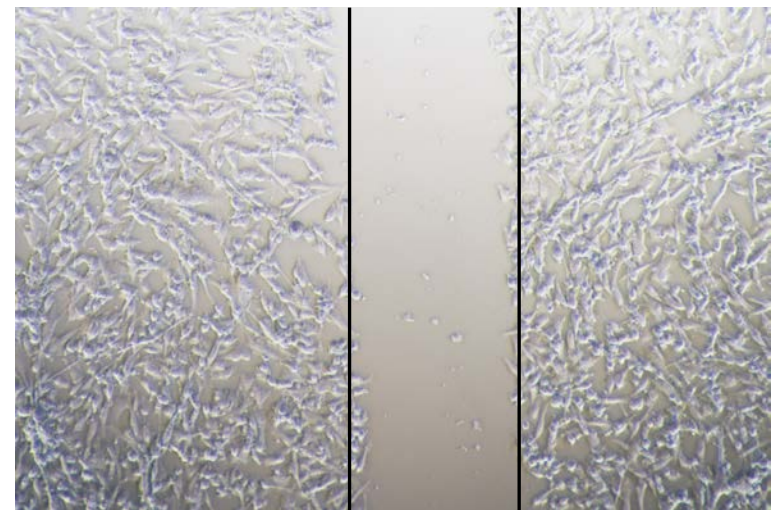

siNC

siLYR  
M4-  
AS1-1

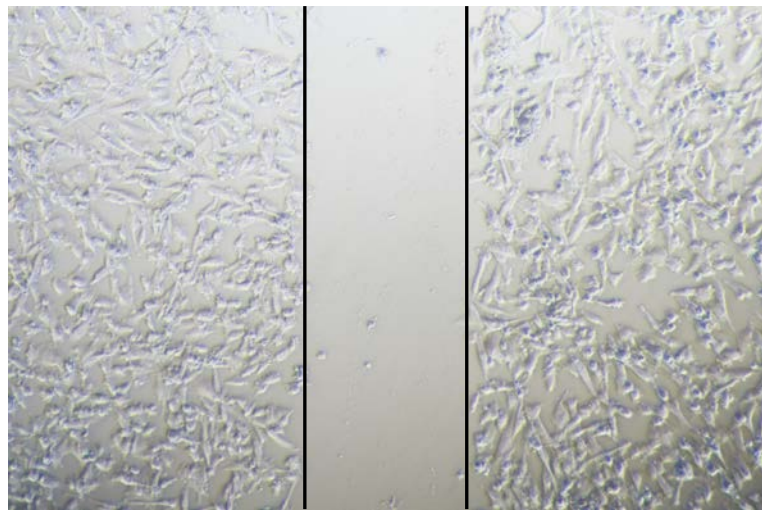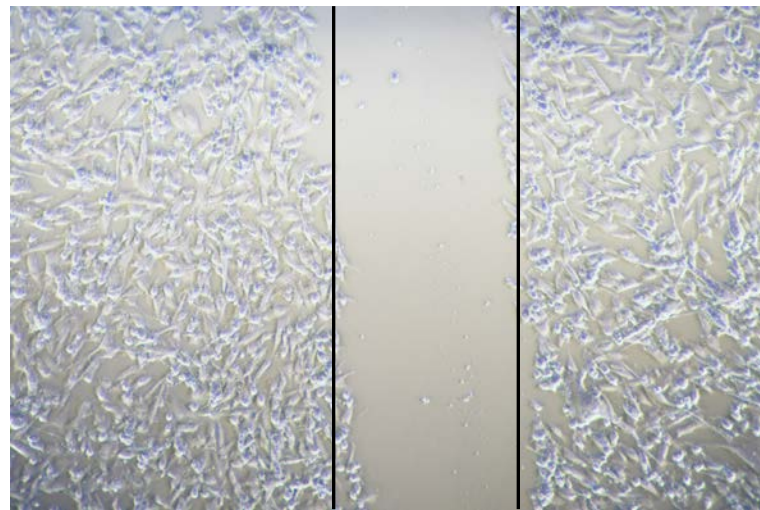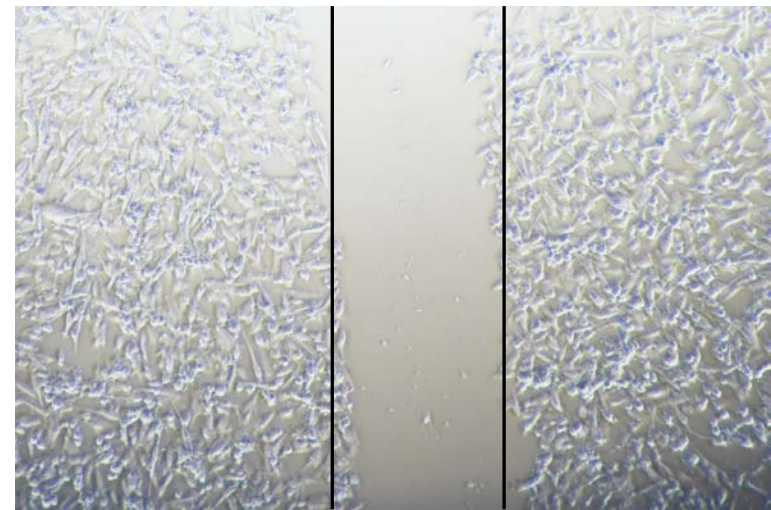

siLYR  
M4-  
AS1-2

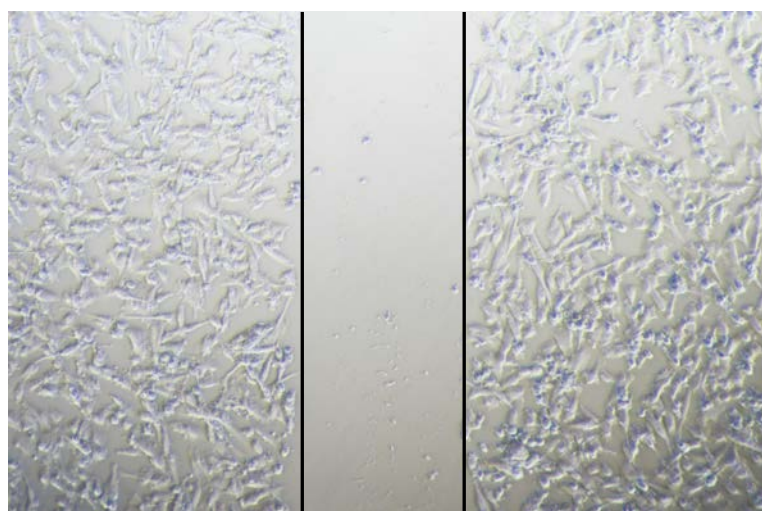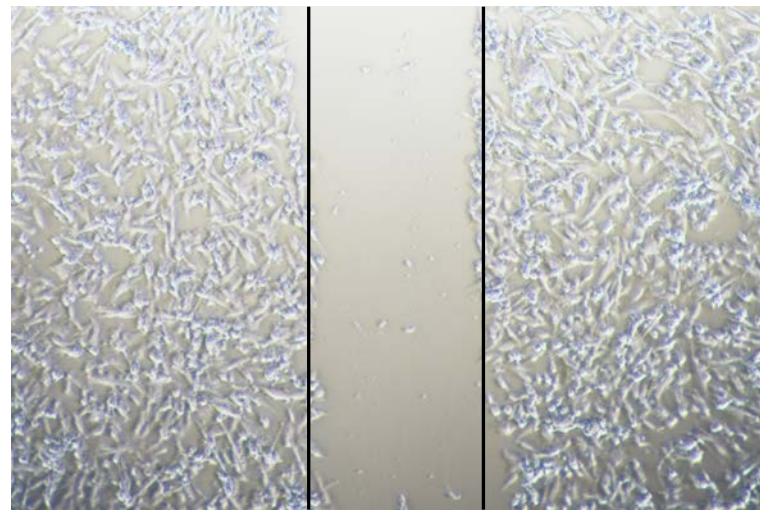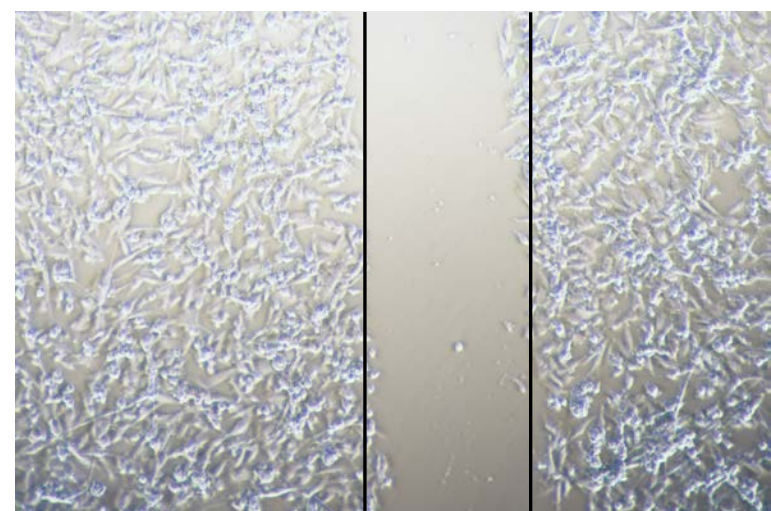

24H  
U87 MG

siNC

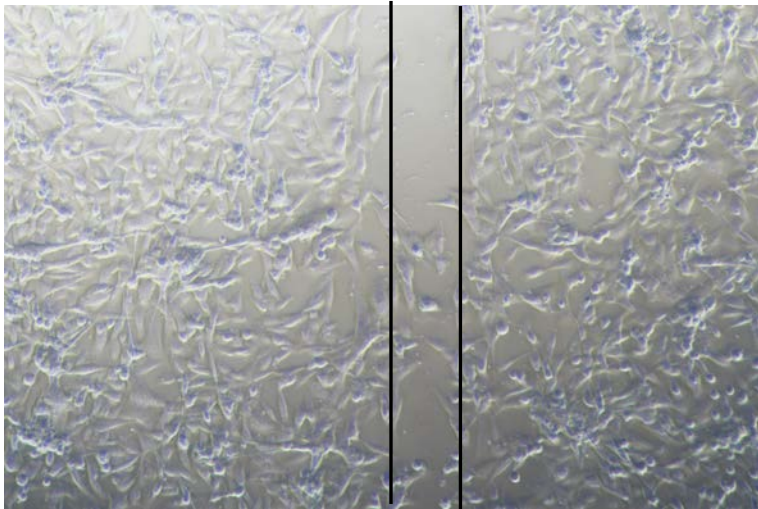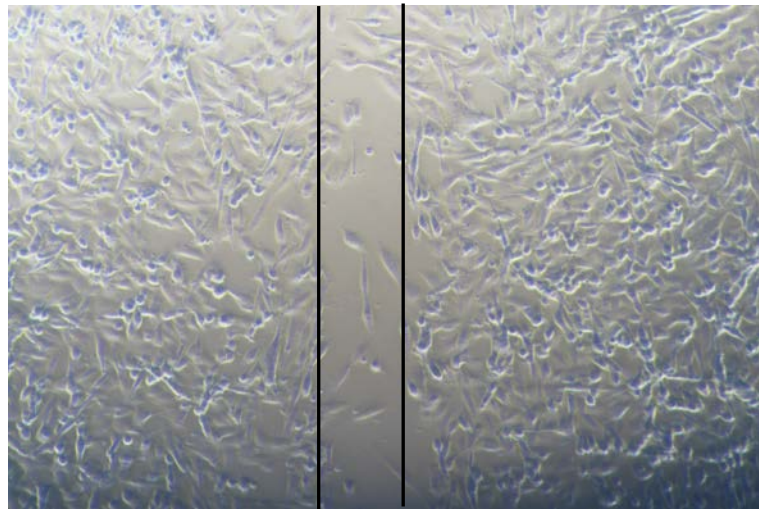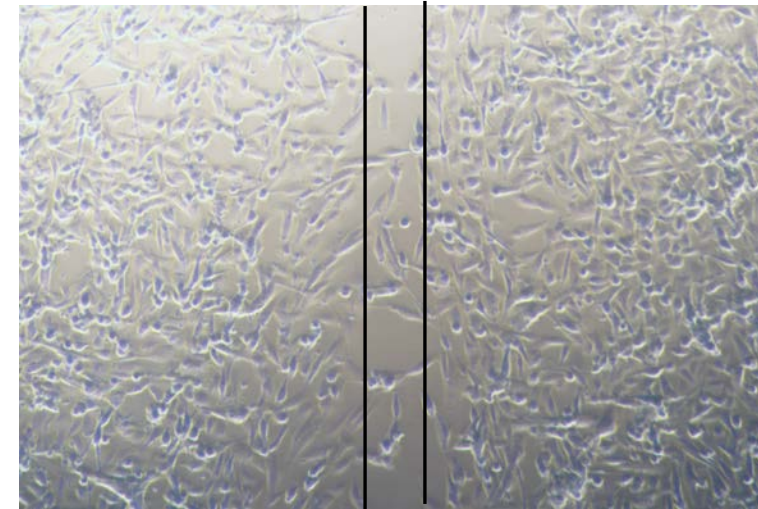

siLYR  
M4-  
AS1-1

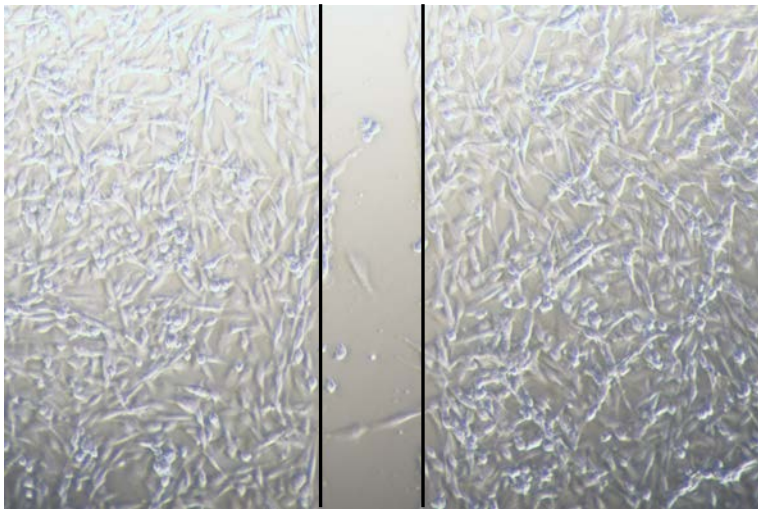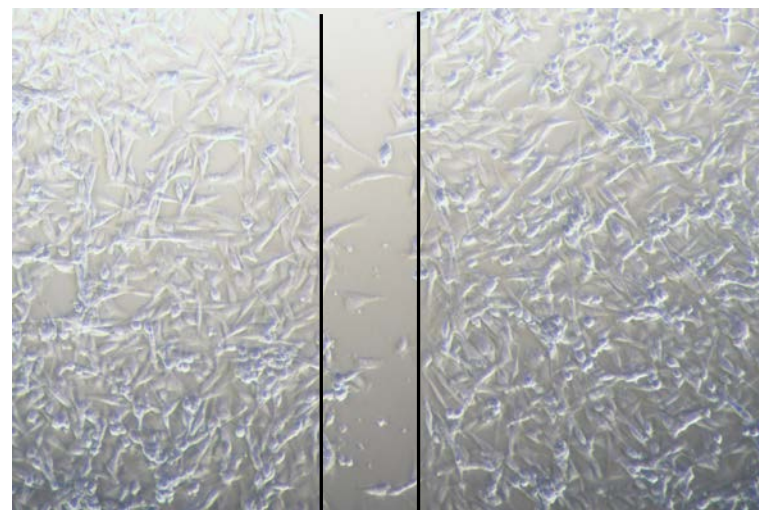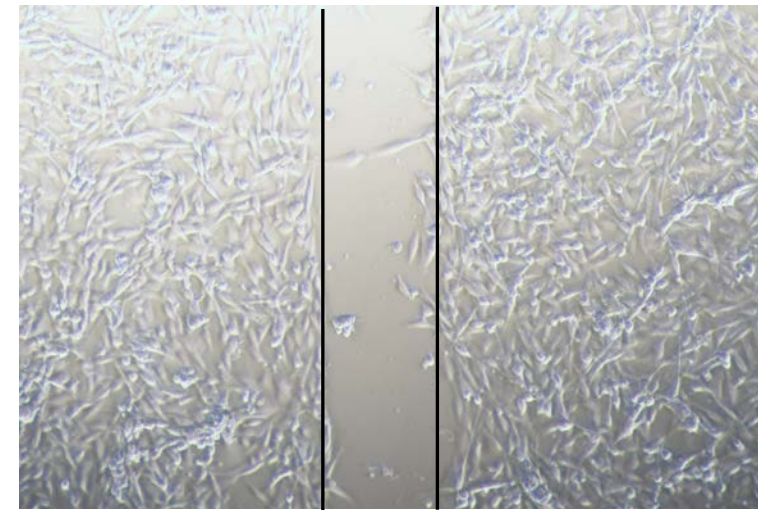

siLYR  
M4-  
AS1-2

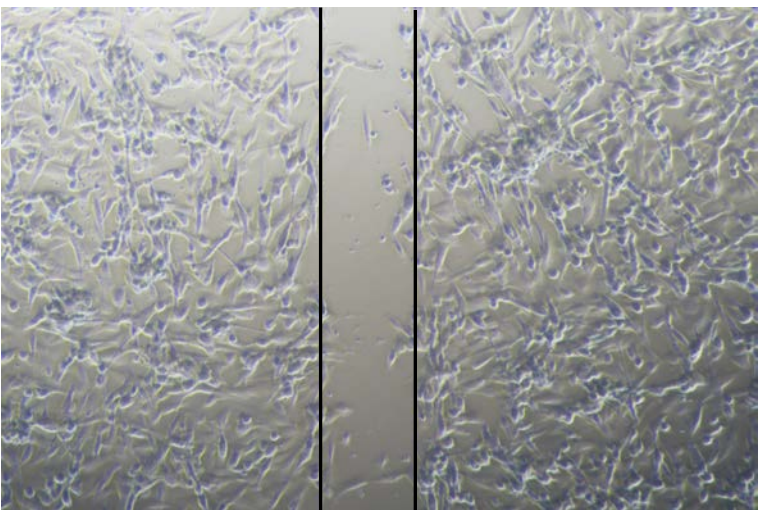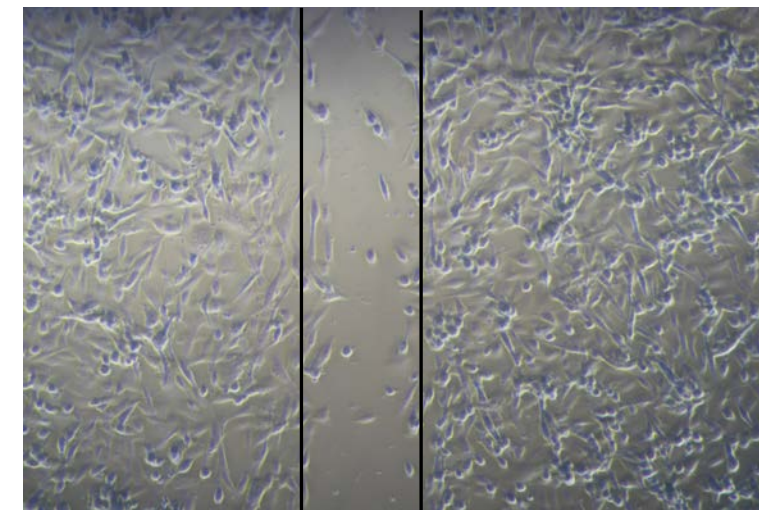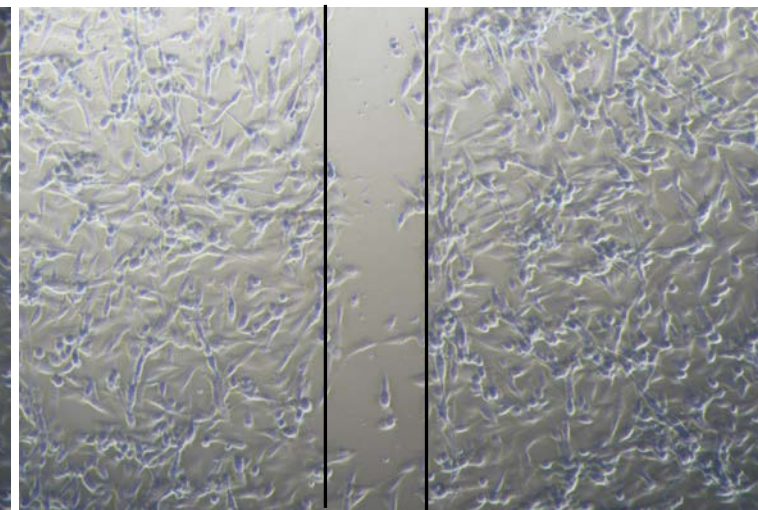

OH  
U251

siNC

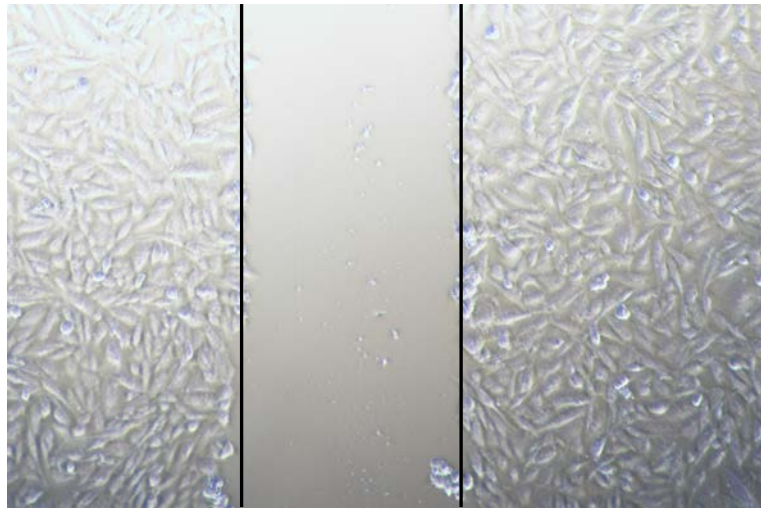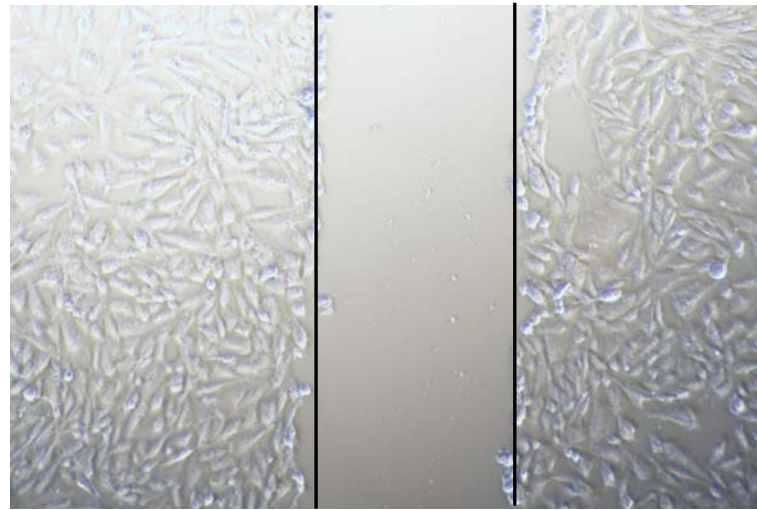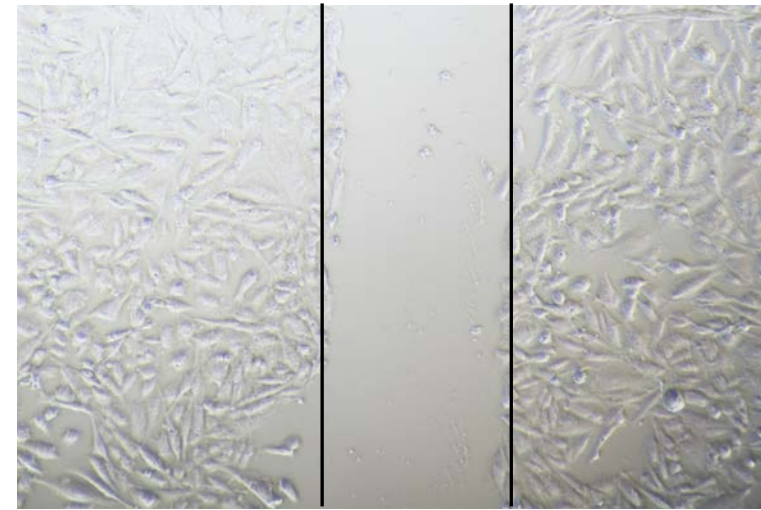

siLYR  
M4-  
AS1-1

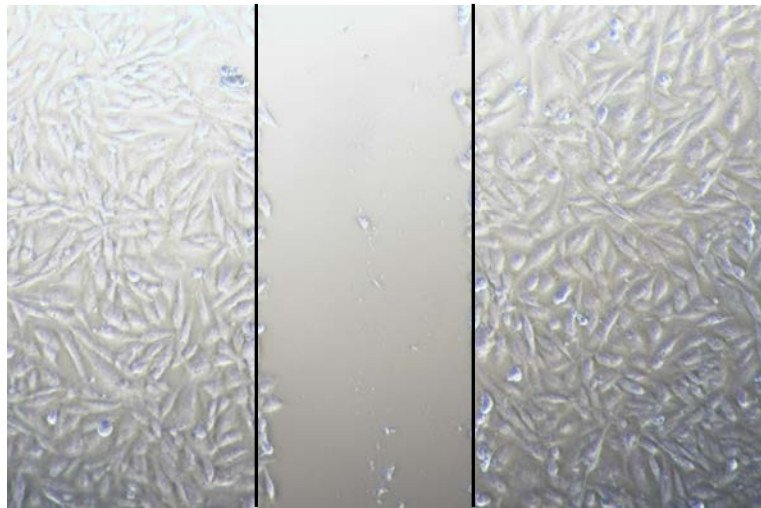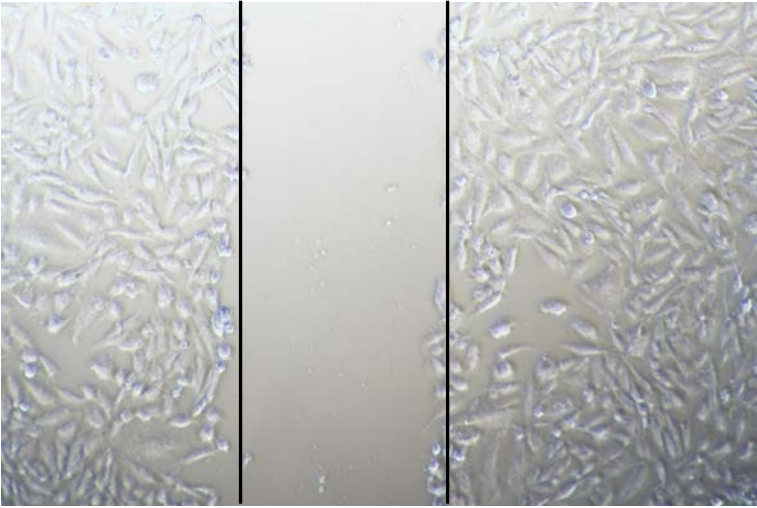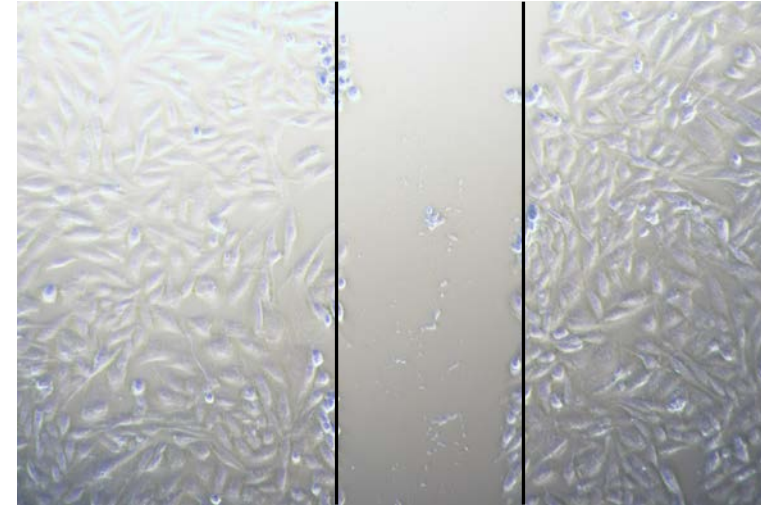

siLYR  
M4-  
AS1-2

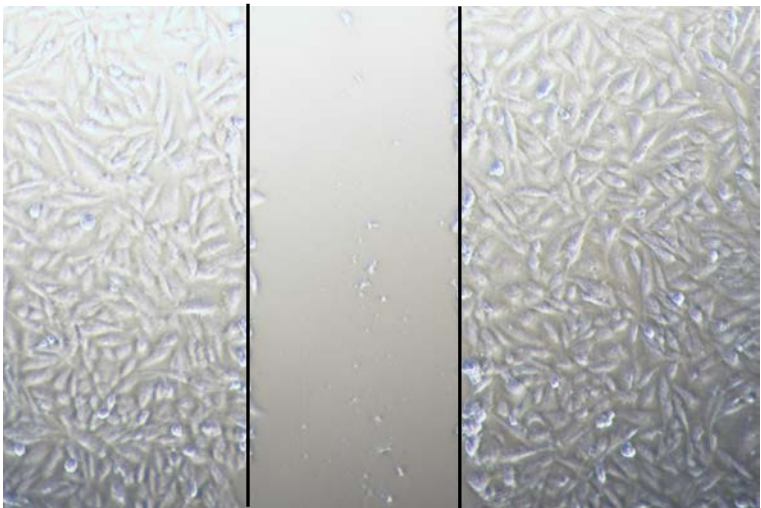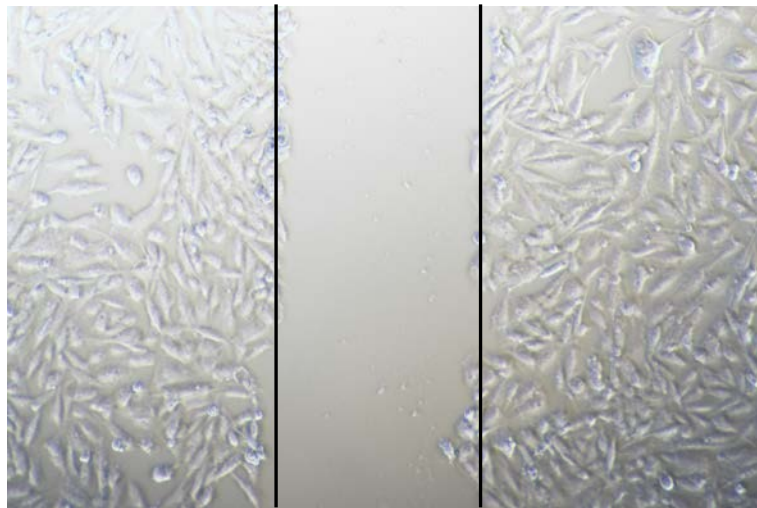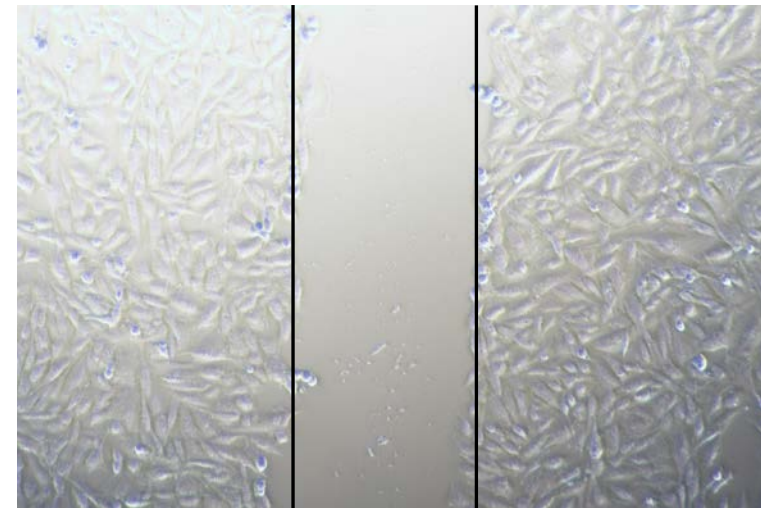

24H  
U251

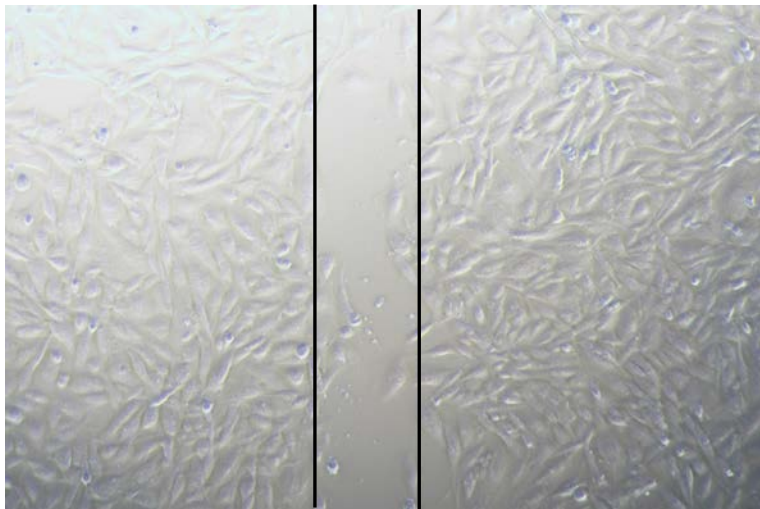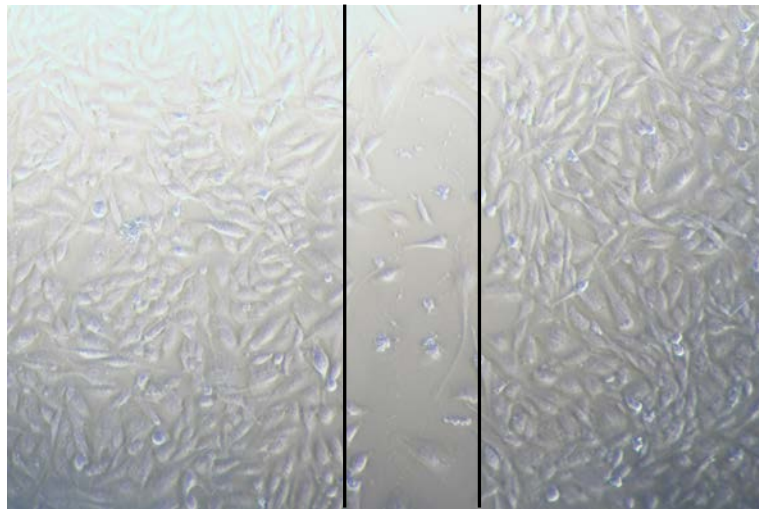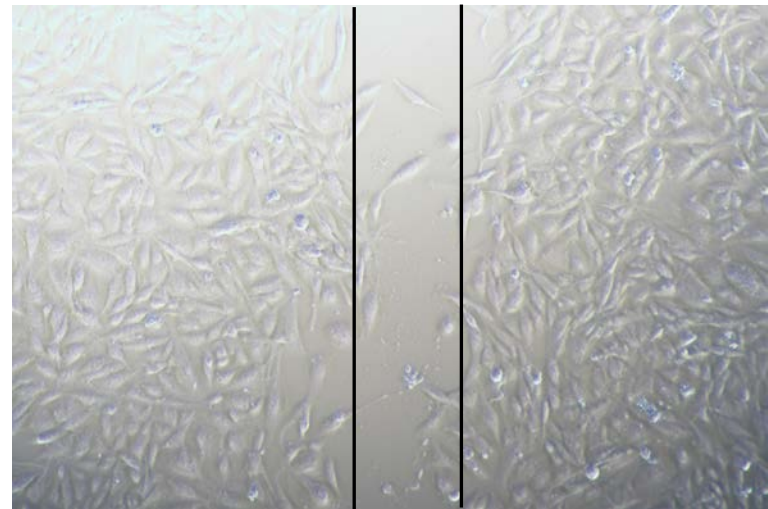

siNC

siLYR  
M4-  
AS1-1

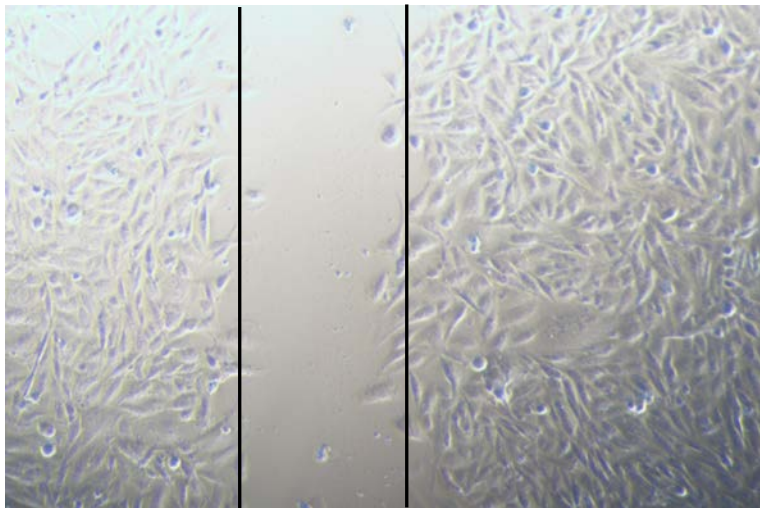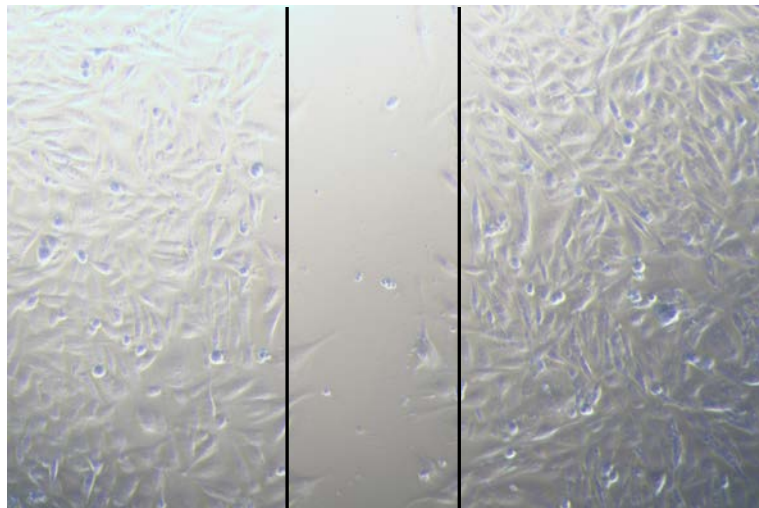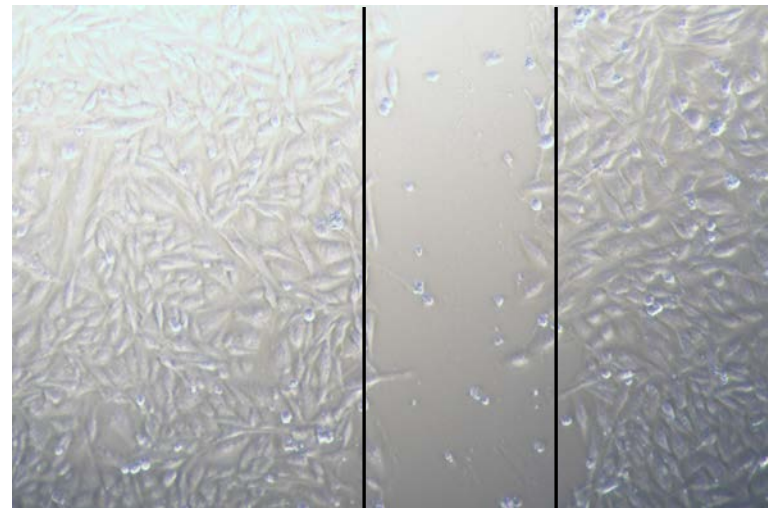

siLYR  
M4-  
AS1-2

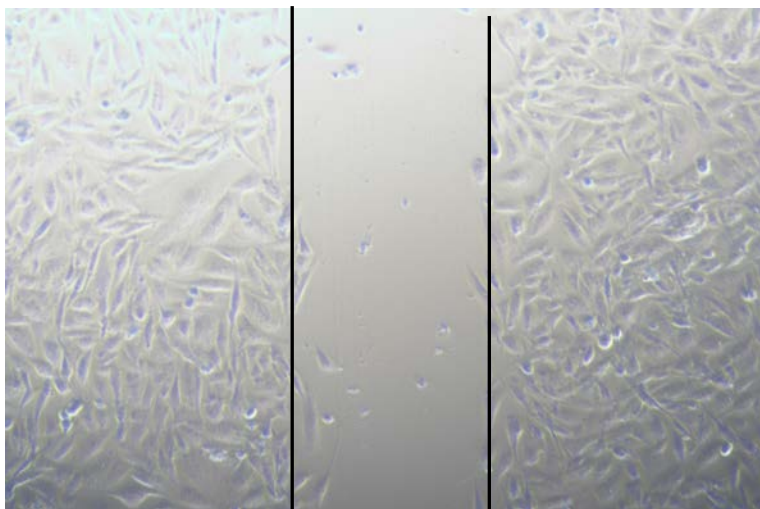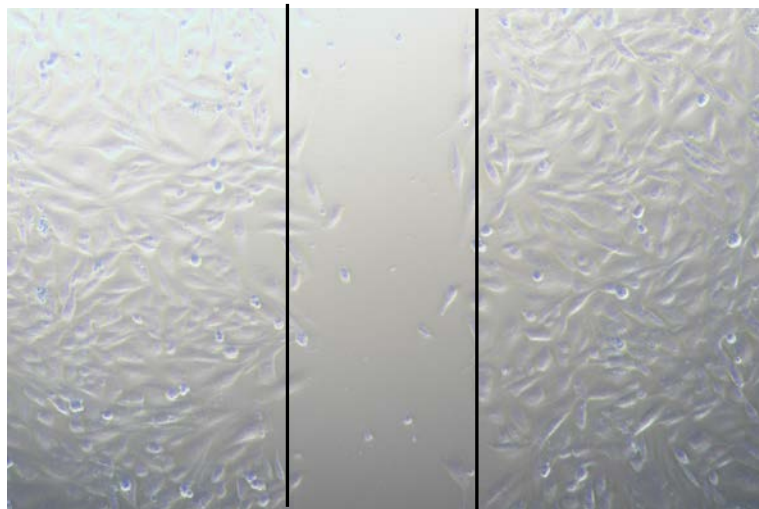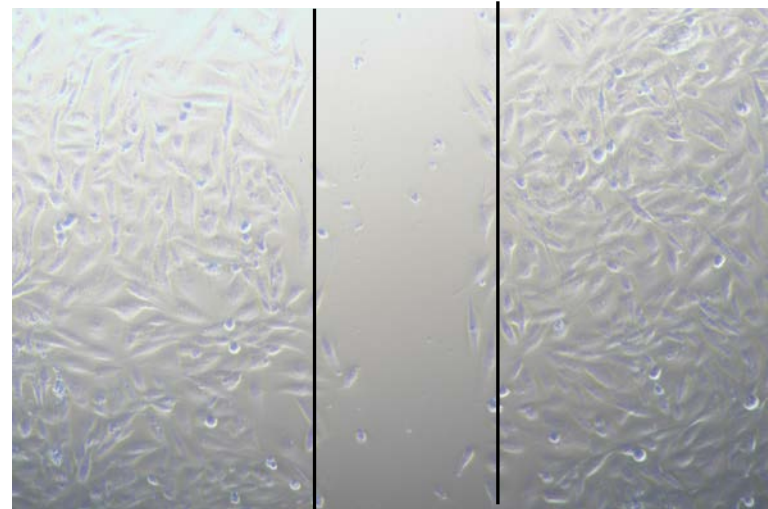

Supplement: wound_healing.pdf [file wound_healing.pdf]
