# Supplementary material for: High LYRM4-AS1 predicts poor prognosis in patients with glioma and correlates with immune infiltration
Source: PeerJ. 2023 Oct 3;11:e16104. doi: 10.7717/peerj.16104 (PMC10557942; doi:10.7717/peerj.16104)
Supplement: Supplemental Information 14 [file peerj-11-16104-s013.xlsx]

## Sheet: U87-2D
U87 MG-2 DAY										U8-2DAY
sample1					sample2					sample3
name	NC	SIRNA-1	SIRNA-2		name	NC	SIRNA-1	SIRNA-2		name	NC	SIRNA-1	SIRNA-2
gene	27.7164	28.3822	29.0403		gene	26.9039	28.7721	29.3442		gene	26.482	28.8724	29.3014
	27.8572	28.2859	29.2694			26.9835	29.5871	29.2085			26.8934	29.1363	29.2058
	27.6312	29.9304	29.7522			26.9696	29.7203	28.4755			26.8342	29.2529	29.192
β-actin	21.4537	21.8083	21.9296		β-actin	21.855	22.5047	22.0956		β-actin	20.8735	21.9442	22.3627
	22.7081	21.9442	21.9957			21.9555	22.8661	22.6567			21.9914	21.8846	22.8606
	21.5291	22.4223	22.2792			21.9518	22.9057	22.5745			21.1289	21.897	22.785
mean of β-actin	21.897	22.0583	22.0682		mean of β-actin	21.9208	22.7588	22.4423		mean of β-actin	21.3313	21.9086	22.6694
△T	5.8194	6.32389	6.97211		△T	4.98307	6.01331	6.9019		△T	5.15077	6.96381	6.63203
	5.96026	6.22762	7.20127			5.06274	6.82823	6.76618			5.56215	7.22766	6.53638
	5.73428	7.87208	7.68402			5.0488	6.96144	6.0332			5.5029	7.34433	6.52256
mean of T	5.83798				mean of T	5.03154				mean of T	5.40528
△△T	-0.0185795	0.485909	1.13413		△△T	-0.0484638	0.981773	1.87036		△△T	-0.254506	1.55853	1.22675
	0.122279	0.389644	1.36329			0.0311985	1.79669	1.73464			0.156878	1.82239	1.1311
	-0.1037	2.0341	1.84604			0.0172653	1.9299	1.00166			0.0976283	1.93906	1.11728
2-△△T	1.01296	0.714047	0.455609		2-△△T	1.03416	0.506357	0.273505		2-△△T	1.19293	0.339497	0.427279
	0.918735	0.763318	0.388696			0.978607	0.287834	0.300484			0.896964	0.282752	0.456567
	1.07453	0.24416	0.278155			0.988104	0.262448	0.499426			0.934568	0.260787	0.460961
mean	1.00207	0.573842	0.374153		mean	1.00029	0.352213	0.357805		mean	1.00815	0.294345	0.448269
U87	1.00207	0.573842	0.374153		Standardization	1	0.572654	0.373379
	1.00029	0.352213	0.357805			1	0.35211	0.3577
	1.00815	0.294345	0.448269			1	0.291965	0.444643

## Sheet: U251-2D
U251-2 DAY
sample1					sample2					sample3
name	NC	SIRNA-1	SIRNA-2		name	NC	SIRNA-1	SIRNA-2		name	NC	SIRNA-1	SIRNA-2
gene	27.235	28.8226	28.4306		gene	26.9754	28.0871	28.2212		gene	26.5559	27.6045	29.1289
	27.2348	28.4432	28.4553			26.8134	28.1353	28.1079			26.6845	28.114	28.6633
	27.4203	28.7174	28.2164			27.0878	28.1051	28.151			26.2583	27.4956	27.7593
β-actin	22.9228	22.9288	22.0729		β-actin	22.8775	22.6091	23.1042		β-actin	22.5479	22.7696	22.6631
	22.6537	22.9987	22.8775			22.5889	22.3542	22.8058			22.5548	22.7261	22.7634
	22.6075	22.9695	23.1647			22.3194	22.9613	22.8285			22.5984	22.4718	22.909
mean of β-actin	22.728	22.9657	22.705		mean of β-actin	22.5953	22.6416	22.9128		mean of β-actin	22.567	22.6558	22.7785
△T	4.50704	5.85694	5.72556		△T	4.38011	5.44555	5.30833		△T	3.98888	4.94872	6.35043
	4.50678	5.47748	5.75028			4.21813	5.49378	5.1951			4.11745	5.45822	5.88481
	4.69231	5.75173	5.51138			4.49249	5.46355	5.23818			3.69128	4.83975	4.98081
mean of T	4.56871				mean of T	4.36358				mean of T	3.93254
△△T	-0.0616677	1.28823	1.15684		△△T	0.0165371	1.08197	0.944756		△△T	0.056346	1.01618	2.4179
	-0.0619324	0.908769	1.18156			-0.14545	1.1302	0.831524			0.184915	1.52568	1.95227
	0.1236	1.18302	0.942666			0.128912	1.09998	0.874599			-0.241261	0.907213	1.04827
2-△△T	1.04367	0.409454	0.448492		2-△△T	0.988603	0.472382	0.519517		2-△△T	0.961697	0.494422	0.187129
	1.04386	0.53264	0.440873			1.10608	0.456852	0.561935			0.879701	0.347315	0.258409
	0.917894	0.440429	0.520271			0.914521	0.466524	0.545405			1.18203	0.533214	0.483547
mean	1.00181	0.460841	0.469879		mean	1.00307	0.465253	0.542286		mean	1.00781	0.458317	0.309695
U251	1.00181	0.460841	0.469879		Standardization	1	0.460008	0.46903
	1.00307	0.465253	0.542286			1	0.46383	0.540628
	1.00781	0.458317	0.309695			1	0.454766	0.307296

## Sheet: U87-7D
U87 MG-7 DAY
sample1					sample2					sample3
name	NC	SIRNA-1	SIRNA-2		name	NC	SIRNA-1	SIRNA-2		name	NC	SIRNA-1	SIRNA-2
gene	26.9056	27.8174	27.8361		gene	27.9698	27.7314	27.9497		gene	27.9466	27.4407	28.0985
	27.0601	27.917	27.9742			27.9521	27.8196	27.8687			28.1256	27.5151	28.277
	27.0297	27.9145	28.1596			28.0893	27.9592	28.1593			27.9395	27.4498	28.3854
β-actin	20.8555	21.2791	21.6248		β-actin	23.6247	22.9624	23.0312		β-actin	22.4181	21.3547	22.1194
	21.2558	21.9384	22.0276			23.9737	23.3751	23.4115			22.7994	21.5255	22.7532
	21.0968	21.9292	21.6868			23.7294	23.2009	23.5025			22.4052	21.3752	22.8981
mean of β-actin	21.0694	21.7156	21.7797		mean of β-actin	23.7759	23.1795	23.3151		mean of β-actin	22.5409	21.4185	22.5902
△T	5.83628	6.10184	6.05633		△T	4.19384	4.55187	4.6346		△T	5.40567	6.02222	5.50828
	5.99071	6.20144	6.19449			4.17621	4.64009	4.55365			5.58472	6.09664	5.68677
	5.96038	6.19895	6.37985			4.31338	4.77971	4.84422			5.39859	6.03128	5.79519
mean of T	5.92912				mean of T	4.22781				mean of T	5.46299
△△T	-0.092844	0.172718	0.127204		△△T	-0.0339667	0.324056	0.406785		△△T	-0.0573196	0.559226	0.0452875
	0.0615864	0.272316	0.265366			-0.0516001	0.412282	0.325843			0.121721	0.633643	0.223771
	0.0312576	0.269829	0.450728			0.0855668	0.551896	0.616409			-0.0644016	0.568289	0.332195
2-△△T	1.06647	0.88717	0.915604		2-△△T	1.02382	0.798821	0.754302		2-△△T	1.04053	0.678666	0.969097
	0.95821	0.827989	0.831988			1.03641	0.751434	0.797832			0.91909	0.644547	0.856324
	0.978567	0.829418	0.731673			0.942414	0.682123	0.652293			1.04565	0.674416	0.794327
mean	1.00108	0.848192	0.826422		mean	1.00088	0.744126	0.734809		mean	1.00176	0.665876	0.873249
U87	1.00108	0.848192	0.826422		Standardization	1	0.847275	0.825528
	1.00088	0.744126	0.734809			1	0.743469	0.73416
	1.00176	0.665876	0.873249			1	0.664708	0.871717

## Sheet: U251-7D
U251-7 DAY
sample1					sample2					sample3
name	NC	SIRNA-1	SIRNA-2		name	NC	SIRNA-1	SIRNA-2		name	NC	SIRNA-1	SIRNA-2
gene	28.4802	28.8413	28.7317		gene	27.2114	27.0325	27.2799		gene	26.6585	27.2953	26.9604
	28.4056	29.1042	28.8571			27.0541	27.1547	27.4195			27.0774	27.2834	27.1003
	28.7707	29.0135	28.877			26.9712	27.0638	27.2063			26.7761	27.5011	27.1903
β-actin	22.5352	22.5564	22.6055		β-actin	21.5825	21.2344	21.7347		β-actin	22.4238	22.2421	22.6909
	22.8065	22.6393	22.6853			21.5777	21.4513	21.6977			22.8947	22.8105	22.8952
	22.9316	22.8209	22.6492			22.1701	21.7639	21.1787			22.765	23.0742	22.6261
mean of β-actin	22.7578	22.6722	22.6467		mean of β-actin	21.7768	21.4832	21.5371		mean of β-actin	22.6945	22.7089	22.7374
△T	5.72246	6.16907	6.08507		△T	5.43462	5.54934	5.74284		△T	3.964	4.58636	4.22299
	5.64784	6.43197	6.21046			5.27731	5.67155	5.8824			4.38294	4.57451	4.36295
	6.01293	6.34128	6.23034			5.19444	5.58062	5.66921			4.08156	4.7922	4.45287
mean of T	5.79441				mean of T	5.30213				mean of T	4.14283
△△T	-0.071949	0.374667	0.29066		△△T	0.132498	0.24721	0.440719		△△T	-0.178832	0.443528	0.0801614
	-0.14657	0.637559	0.416051			-0.0248108	0.369429	0.580272			0.240103	0.431678	0.220121
	0.218519	0.546872	0.435932			-0.107687	0.278495	0.367089			-0.061271	0.649369	0.310037
2-△△T	1.05114	0.771283	0.817528		2-△△T	0.912251	0.842524	0.736767		2-△△T	1.13197	0.735334	0.945952
	1.10693	0.6428	0.749473			1.01735	0.774089	0.668838			0.846685	0.741399	0.858494
	0.859447	0.684502	0.739216			1.0775	0.824451	0.775345			1.04338	0.637559	0.806621
mean	1.00584	0.699528	0.768739		mean	1.00237	0.813688	0.726983		mean	1.00735	0.704764	0.870355
U251	1.00584	0.699528	0.768739	Standardization	1	0.695467	0.764276
	1.00237	0.813688	0.726983		1	0.811768	0.725268
	1.00735	0.704764	0.870355		1	0.699625	0.864009
